# Supplementary material
Source: HighWire-hosted journal article supplement (http://www.jneurosci.org/highwire/filestream/601188/field_highwire_adjunct_files/0/Supplemental_Figure.pdf)

## MONOPHASIC

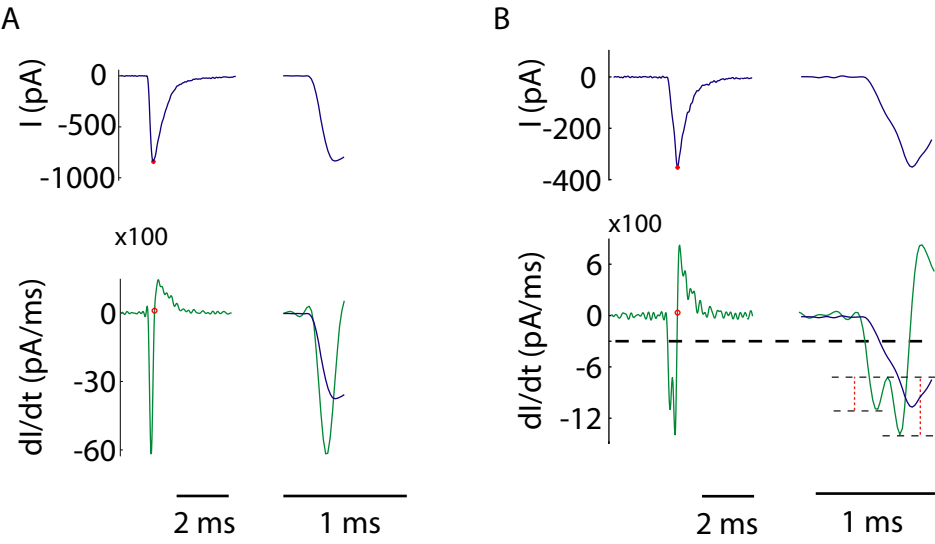

## MULTIPHASIC

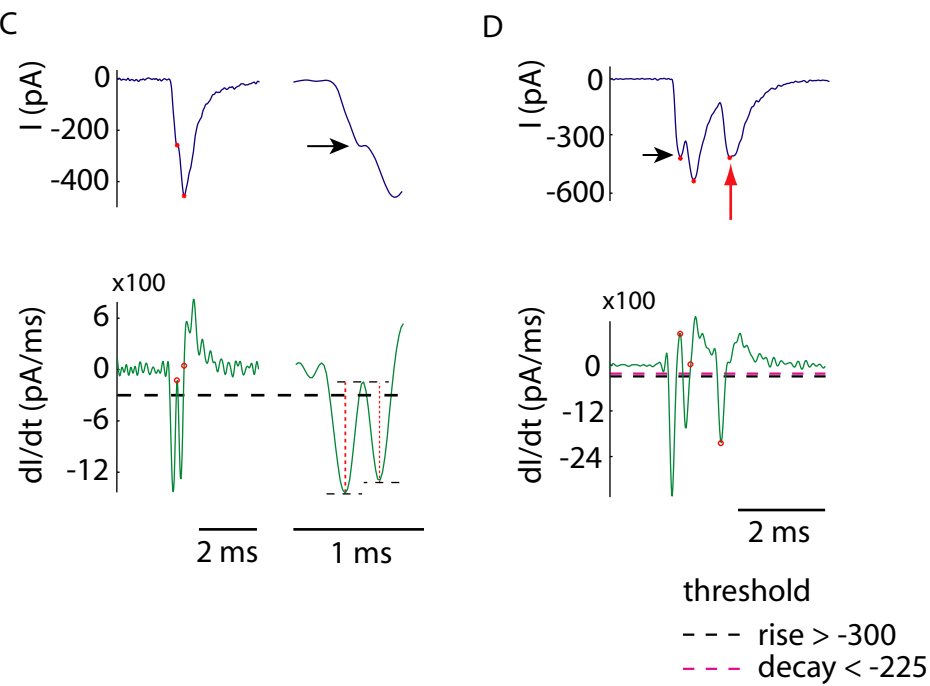

threshold

--- rise > -300

- - - decay < -225

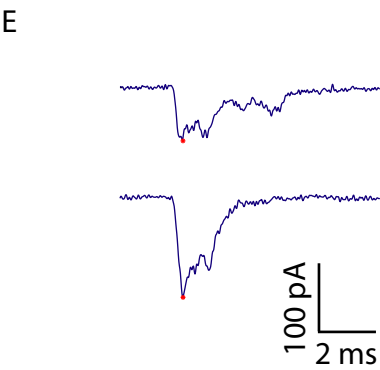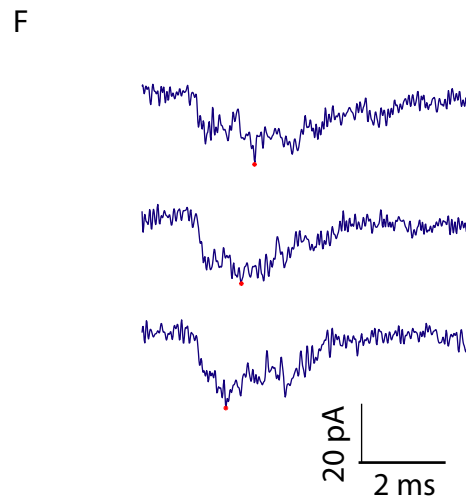

Supplement: Supplemental_Figure.pdf [file Supplemental_Figure.pdf]
